# Supplementary material for: Fabrication of different copper nanostructures on indium-tin-oxide electrodes: shape dependent electrocatalytic activity
Source: Royal Society of Chemistry journal article supplement (doi:10.1039/c6ce01846g), 2016-01-01
Supplement: c6ce01846g1.pdf [file c6ce01846g1.pdf]

**Supplementary Information (SI)**

**Fabrication of Different Copper Nanostructures on Indium-Tin-Oxide  
Electrode: Shape Dependent Electrocatalytic Activity**

**N.S.K. Gowthaman and S. Abraham John\***

Centre for Nanoscience and Nanotechnology  
Department of Chemistry, Gandhigram Rural Institute  
Gandhigram-624 302, Dindigul, Tamilnadu, India  
E-mail : [abrajohn@yahoo.co.in](mailto:abrajohn@yahoo.co.in)

---

\*Corresponding author: Tel: +91 451 245 2371; Fax : + 91 451 245 3031

E-mail: [abrajohn@yahoo.co.in](mailto:abrajohn@yahoo.co.in) , [s.abrahamjohn@ruraluniv.ac.in](mailto:s.abrahamjohn@ruraluniv.ac.in)

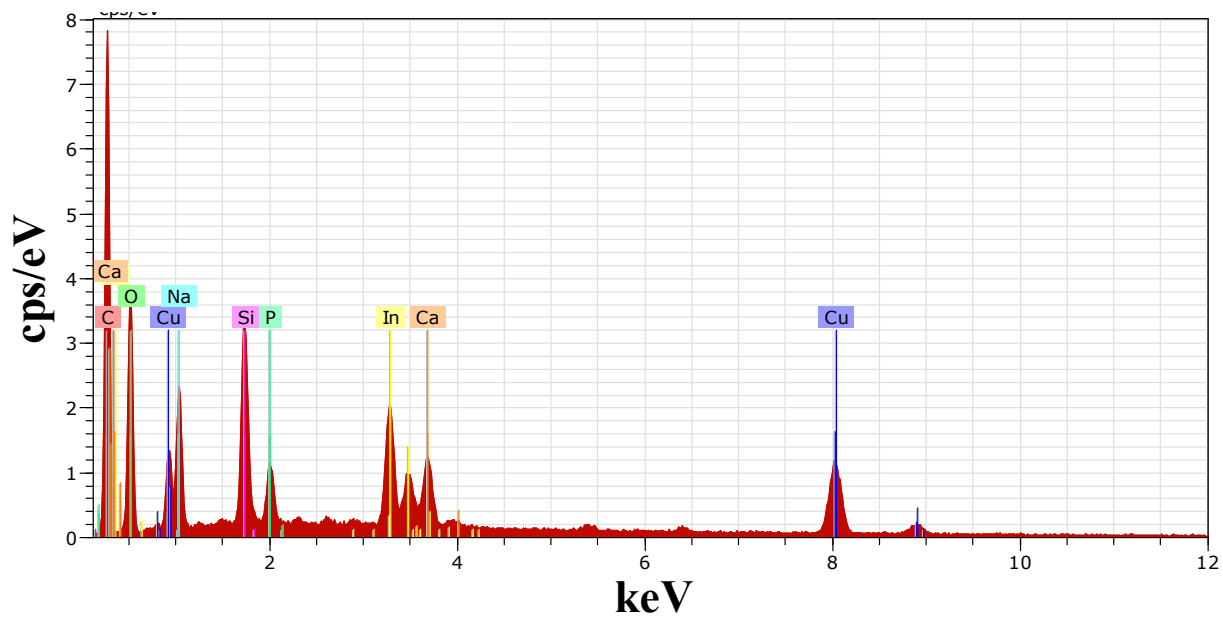

**Figure S1.**

EDAX spectrum obtained for dendritic-CuNS modified ITO substrate.

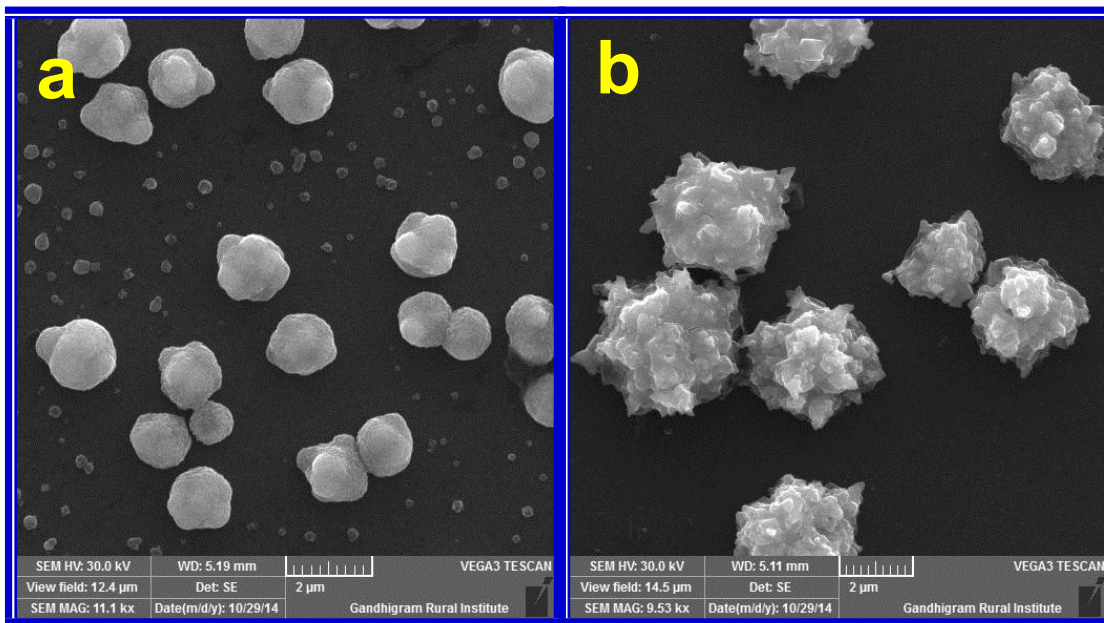

**Figure S2.**

SEM images obtained for ITO/CuNS at the deposition potential of -0.30 V for 400 s using 10 mM CuSO<sub>4</sub> in 0.1 M (a) HNO<sub>3</sub> and (b) HClO<sub>4</sub> medium.

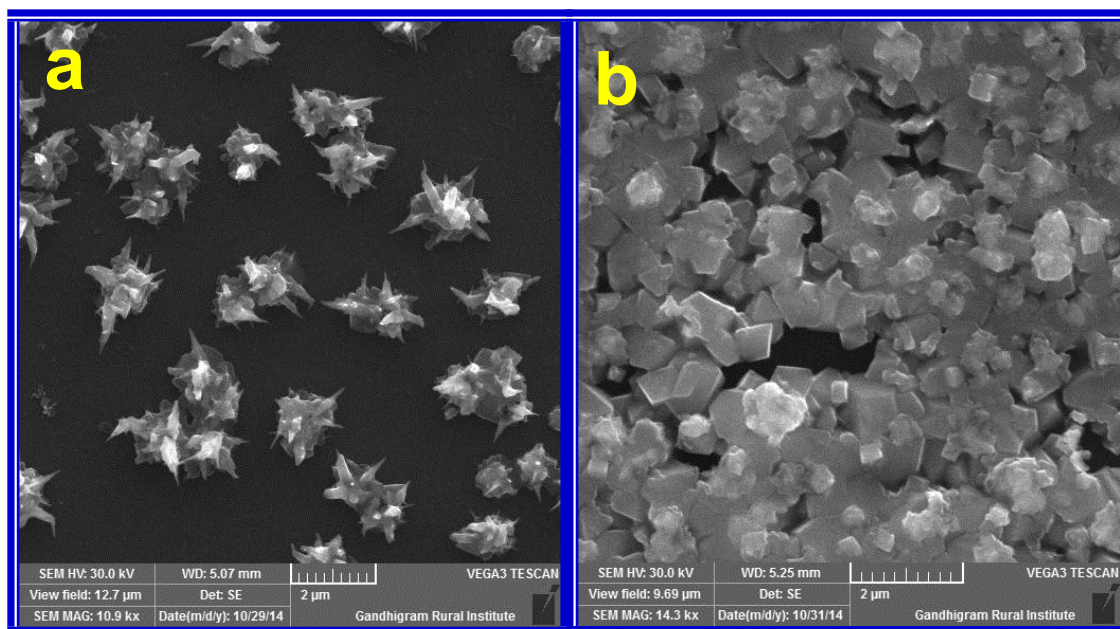

**Figure S3.**

SEM images obtained for ITO/CuNS at the deposition potential of  $-0.30$  V for 400 s using 10 mM  $\text{CuNO}_3$  in 0.1 M  $\text{H}_2\text{SO}_4$  containing (a) 10 mM  $\text{Na}_2\text{SO}_4$  and (b) 50 mM  $\text{Na}_2\text{SO}_4$ .

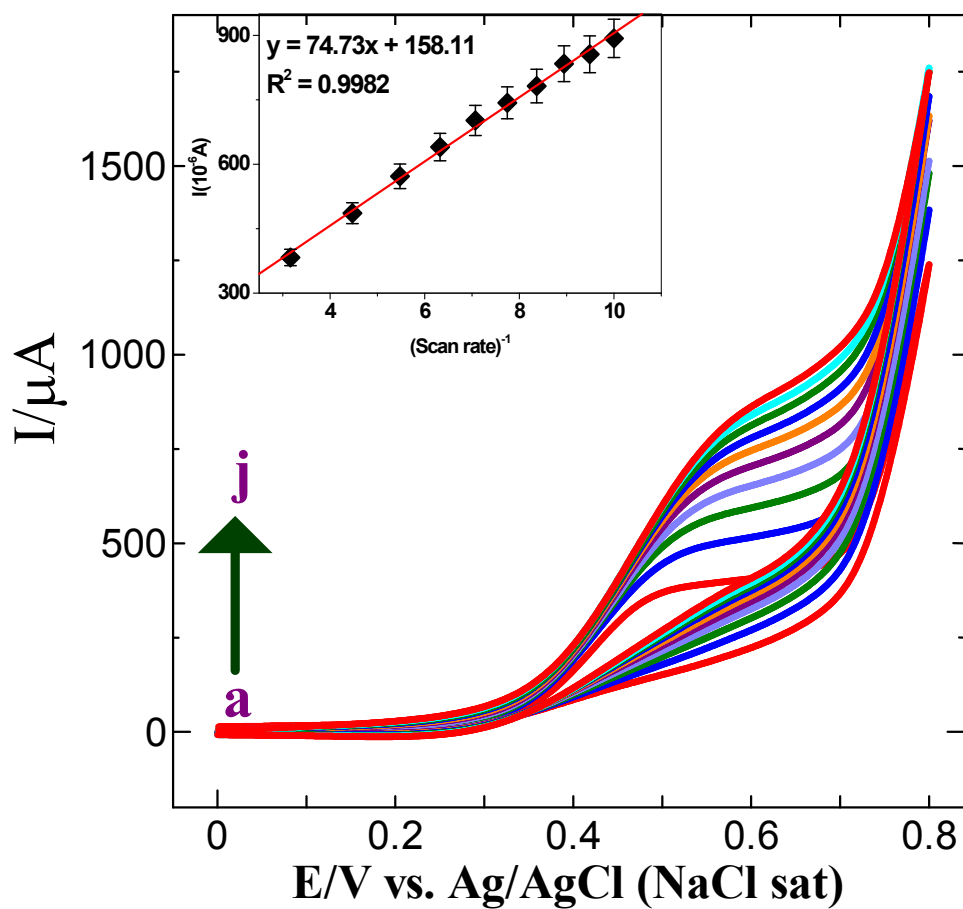

**Figure S4.** CVs obtained for 1mM glucose at dendritic CuNS modified ITO electrode at different scan rates of 10-100  $\text{mV s}^{-1}$  (a-j) in 0.1 M NaOH. Inset: corresponding calibration plot obtained for current vs. square root of scan rate.

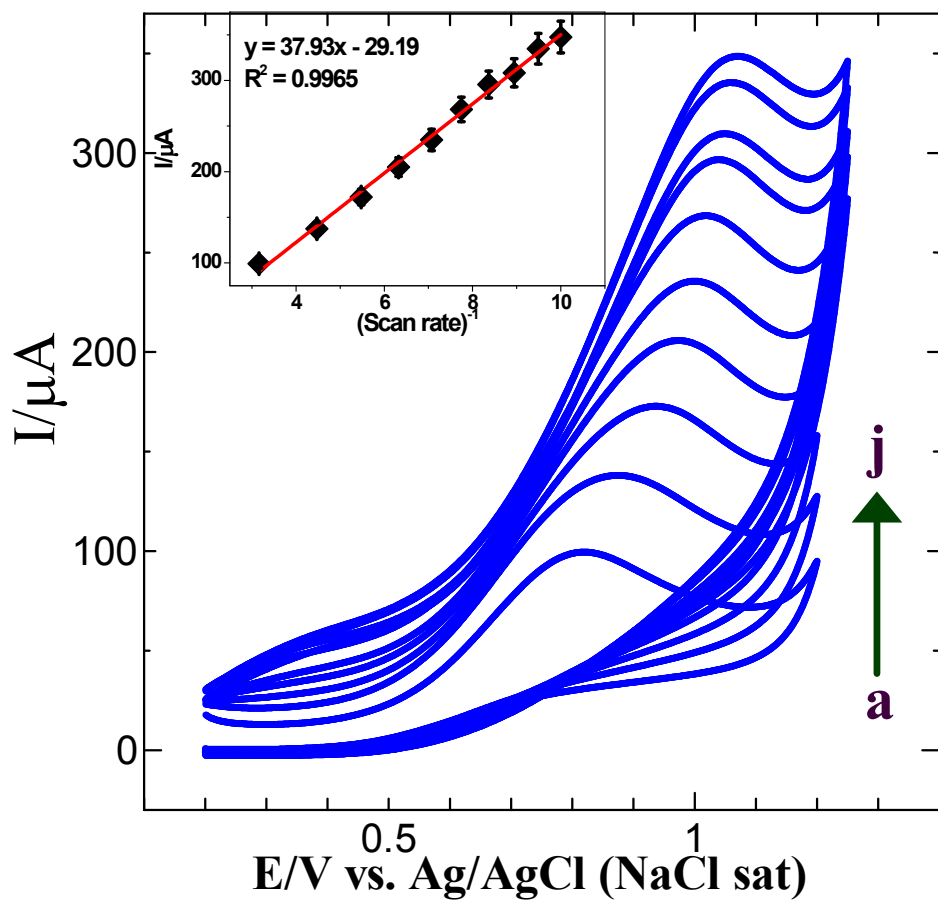

**Figure S5.**

CVs obtained for 0.5 mM hydrazine at ITO/dendritic-CuNS in 0.2 M PBS at pH 7.2 at different scan rates from 10 to 100  $\text{mV s}^{-1}$  (a-f). Inset: the corresponding calibration plot obtained for current vs. square root of scan rate.

| Parameter                | Bare ITO               | CuNS                   |                        |                        |                        |
|--------------------------|------------------------|------------------------|------------------------|------------------------|------------------------|
|                          |                        | cubes                  | spherical              | dendrites              | prickles               |
| $R_s$ (k $\Omega$ )      | 0.089                  | 0.090                  | 0.0853                 | 0.0876                 | 0.090                  |
| CPE ( $\mu$ F)           | $4.789 \times 10^{-5}$ | $6.173 \times 10^{-5}$ | $4.563 \times 10^{-5}$ | $9.212 \times 10^{-5}$ | $9.827 \times 10^{-5}$ |
| $R_{CT}$ (k $\Omega$ )   | 4.939                  | 1.486                  | 1.021                  | 0.719                  | 1.237                  |
| $k_{et}$ (cm s $^{-1}$ ) | $5.39 \times 10^{-8}$  | $1.79 \times 10^{-7}$  | $2.77 \times 10^{-7}$  | $3.70 \times 10^{-7}$  | $2.15 \times 10^{-7}$  |

**Table S1. Impedance spectral data**
